# Supplementary material for: Towards a Biohybrid Lung: Endothelial Cells Promote Oxygen Transfer through Gas Permeable Membranes
Source: Hindawi journal article supplement (doi:10.1155/2017/5258196), 2017-01-01
Supplement: f1 [file 5258196.f1.pdf]

# Towards a biohybrid lung: Endothelial cells promote oxygen transfer through gas permeable membranes

---

## Supplementary Data

Table S1: Mean  $pO_2$  of three experiments (index 1, 2, or 3) for both experimental setups, i.e. for the blank (index M) and the endothelialized (index M+C) membrane, in dependence of flow rate and location of sampling (inlet or outlet)

| Flow rate<br>(mL min <sup>-1</sup> ) | Sampling<br>location | pO <sub>2, M</sub> (mmHg) |                 |                 | pO <sub>2, M+C</sub> (mmHg) |                  |                  |
|--------------------------------------|----------------------|---------------------------|-----------------|-----------------|-----------------------------|------------------|------------------|
|                                      |                      | M <sub>1</sub>            | M <sub>2</sub>  | M <sub>3</sub>  | M+C <sub>1</sub>            | M+C <sub>2</sub> | M+C <sub>3</sub> |
| 0.4                                  | In                   | 169.00<br>±1.00           | 172.00<br>±1.00 | 186.00<br>±1.73 | 179.33<br>±0.94             | 165.33<br>±0.94  | 182.00<br>±4.97  |
|                                      | Out                  | 293.00<br>±10.58          | 244.67<br>±7.64 | 239.00<br>±3.00 | 329.33<br>±9.84             | 289.67<br>±1.70  | 260.33<br>±2.05  |
| 0.8                                  | In                   | 168.67<br>±1.25           | 170.33<br>±0.47 | 185.67<br>±2.36 | 175.33<br>±1.70             | 178.67<br>±2.87  | 181.67<br>±0.47  |
|                                      | Out                  | 278.00<br>±3.27           | 224.33<br>±2.05 | 227.67<br>±2.87 | 299.33<br>±2.87             | 289.67<br>±4.11  | 239.67<br>±4.78  |
| 1.2                                  | In                   | 166.00<br>±1.41           | 169.67<br>±0.47 | 183.00<br>±2.16 | 176.33<br>±1.25             | 166.00<br>±1.41  | 183.33<br>±2.62  |
|                                      | Out                  | 254.67<br>±1.70           | 209.67<br>±7.41 | 216.00<br>±3.56 | 282.33<br>±6.80             | 255.67<br>±3.09  | 235.67<br>±6.24  |
| 1.6                                  | In                   | 166.00<br>±1.63           | 168.67<br>±0.47 | 183.33<br>±0.47 | 176.33<br>±0.47             | 162.33<br>±0.47  | 182.33<br>±0.47  |
|                                      | Out                  | 237.00<br>±1.41           | 209.67<br>±1.70 | 213.67<br>±3.09 | 280.67<br>±2.87             | 247.67<br>±3.40  | 232.67<br>±0.47  |

Table S2: Oxygen transfer rates (OTRs) of the blank and the endothelialized membrane as well as the absolute difference of both OTRs, all  $OTR_{M+C}$  are significant to  $OTR_M$  ( $p < 0.05$ , labelled \*) throughout the measuring range

| <b>Flow rate<br/>(mL min<sup>-1</sup>)</b> | <b><math>OTR_M</math><br/>(nL s<sup>-1</sup>)</b> | <b><math>OTR_{M+C}</math><br/>(nL s<sup>-1</sup>)</b> | <b><math>\Delta OTR</math><br/>(nL s<sup>-1</sup>)</b> |
|--------------------------------------------|---------------------------------------------------|-------------------------------------------------------|--------------------------------------------------------|
| 0.4                                        | 20.4±1.1                                          | 28.9±0.9*                                             | 8.4±1.5                                                |
| 0.8                                        | 33.6±0.9                                          | 48.0±1.3*                                             | 14.4±1.6                                               |
| 1.2                                        | 39.7±2.2                                          | 60.9±2.5*                                             | 21.2±3.3                                               |
| 1.6                                        | 46.6±1.4                                          | 102.5±2.9*                                            | 55.9±3.2                                               |
